# Supplementary material for: Sustained Benefit of Continuous Glucose Monitoring on A1C, Glucose Profiles, and Hypoglycemia in Adults With Type 1 Diabetes
Source: PubMed Central journal article supplement — Diabetes Care. 2009 Aug 12;32(11):2047–9. doi: 10.2337/dc09-0846 (PMC2768224; doi:10.2337/dc09-0846), 2009-08-12
Supplement: supp_dc09-0846_dc09-0846_Online_Appendix.pdf [file supp_dc09-0846_dc09-0846_Online_Appendix.pdf]

## **Sustained Benefit of Continuous Glucose Monitoring on HbA1c, Glucose Profiles, and Hypoglycemia in Adults with Type 1 Diabetes**

### **On-line Appendix:**

1. Table 1
2. Table 2
3. Figure 1
4. Disclosures
5. Study Group Listing

**Appendix Table 1 (Website).**

Baseline Factors Predictive of Sensor Use  $\geq 6$  days  
Per Week During Month Six of the Trial According to Age Group

|                                                                     | <b>8-&lt;15 years</b> |                                   | <b>15-&lt;25 years</b> |                                   | <b><math>\geq 25</math> years</b> |                                   |
|---------------------------------------------------------------------|-----------------------|-----------------------------------|------------------------|-----------------------------------|-----------------------------------|-----------------------------------|
|                                                                     | <b>N</b>              | <b>% <math>\geq 6</math> days</b> | <b>N</b>               | <b>% <math>\geq 6</math> days</b> | <b>N</b>                          | <b>% <math>\geq 6</math> days</b> |
| <b>Total</b>                                                        | 74                    | 46%                               | 72                     | 29%                               | 86                                | 79%                               |
| <b>Gender</b>                                                       |                       |                                   |                        |                                   |                                   |                                   |
| Female                                                              | 37                    | 57%                               | 38                     | 29%                               | 48                                | 77%                               |
| Male                                                                | 37                    | 35%                               | 34                     | 29%                               | 38                                | 82%                               |
| <b>Race/Ethnicity</b>                                               |                       |                                   |                        |                                   |                                   |                                   |
| Non-White                                                           | 7                     | 43%                               | 12                     | 17%                               | 0                                 |                                   |
| White, Non-Hispanic                                                 | 67                    | 46%                               | 60                     | 32%                               | 86                                | 79%                               |
| <b>Duration of Diabetes (years)</b>                                 |                       |                                   |                        |                                   |                                   |                                   |
| < 5                                                                 | 30                    | 43%                               | 15                     | 33%                               | 3                                 | 67%                               |
| 5-<10                                                               | 35                    | 49%                               | 27                     | 30%                               | 8                                 | 100%                              |
| 10-<20                                                              | 9                     | 44%                               | 30                     | 27%                               | 22                                | 68%                               |
| $\geq 20$                                                           | 0                     |                                   | 0                      |                                   | 53                                | 81%                               |
| <b>Baseline Insulin Modality</b>                                    |                       |                                   |                        |                                   |                                   |                                   |
| MDI                                                                 | 10                    | 30%                               | 22                     | 23%                               | 10                                | 60%                               |
| Pump                                                                | 64                    | 48%                               | 50                     | 32%                               | 76                                | 82%                               |
| <b>Baseline HbA1c</b>                                               |                       |                                   |                        |                                   |                                   |                                   |
| $\geq 8.0\%$                                                        | 27                    | 44%                               | 26                     | 23%                               | 10                                | 60%                               |
| 7.0%- <8.0%                                                         | 29                    | 45%                               | 31                     | 23%                               | 42                                | 81%                               |
| <7.0%                                                               | 18                    | 50%                               | 15                     | 53%                               | 34                                | 82%                               |
| <b>Severe Hypoglycemia in Last 6 Months</b>                         |                       |                                   |                        |                                   |                                   |                                   |
| None                                                                | 71                    | 48%                               | 65                     | 28%                               | 75                                | 77%                               |
| $\geq 1$ episode                                                    | 3                     | 0%                                | 7                      | 43%                               | 11                                | 91%                               |
| <b>Self-reported Home Blood Glucose Meter Measurements Per Day*</b> |                       |                                   |                        |                                   |                                   |                                   |
| 3-5                                                                 | 16                    | 13%                               | 31                     | 16%                               | 21                                | 57%                               |
| 6-8                                                                 | 34                    | 53%                               | 26                     | 27%                               | 44                                | 86%                               |
| $\geq 9$                                                            | 12                    | 50%                               | 4                      | 50%                               | 15                                | 87%                               |
| <b>Education Level of Primary Caregiver<sup>†</sup></b>             |                       |                                   |                        |                                   |                                   |                                   |
| $\leq 12$                                                           | 2                     | 50%                               | 22                     | 14%                               | 2                                 | 50%                               |
| Associate                                                           | 8                     | 38%                               | 6                      | 50%                               | 9                                 | 78%                               |
| Bachelor                                                            | 32                    | 53%                               | 21                     | 38%                               | 37                                | 81%                               |
| Master                                                              | 21                    | 38%                               | 14                     | 36%                               | 30                                | 77%                               |
| Professional                                                        | 11                    | 45%                               | 9                      | 22%                               | 8                                 | 88%                               |
| <b>Household Income<sup>‡</sup></b>                                 |                       |                                   |                        |                                   |                                   |                                   |
| \$25,000 or less                                                    | 2                     | 50%                               | 12                     | 17%                               | 2                                 | 50%                               |
| \$25,001 to \$50,000                                                | 3                     | 67%                               | 13                     | 46%                               | 11                                | 45%                               |
| \$50,001 to \$100,000                                               | 24                    | 58%                               | 14                     | 43%                               | 36                                | 78%                               |
| Over \$100,000                                                      | 37                    | 35%                               | 24                     | 25%                               | 34                                | 91%                               |

\*Collected on randomization form, as assessed by clinic personnel over the last 7 days. Question was added to CRF after study initialization and data were missing for 29 subjects in RT-CGM group.

<sup>†</sup> Education level is for parent/guardian for subjects <15 years old and for the subject for age  $\geq 25$  years. For subjects in the 15 to 24 age group, education level is that of the subject for 28, for the subject's spouse for 1, and the parent for 43.

<sup>‡</sup>20 subjects did not provide household income data. In the 15 to 24 year age group, household income reflects the subject in 35 and parent in 37.

**Appendix Table 2.** Association of First Month CGM Use and CGM Glucose Indices with CGM Use During Month 6 According to Age Group

|                                                  | 8-<15 years |                      | 15-<25 years |                      | ≥25 years |                      |
|--------------------------------------------------|-------------|----------------------|--------------|----------------------|-----------|----------------------|
|                                                  | N*          | % ≥6 days in Month 6 | N            | % ≥6 days in Month 6 | N         | % ≥6 days in Month 6 |
| <b>Total</b>                                     | 73          | 47%                  | 72           | 29%                  | 86        | 79%                  |
| <b>Sensor Use during First 7 Days</b>            |             |                      |              |                      |           |                      |
| 0-7                                              | 10          | 40%                  | 11           | 18%                  | 6         | 50%                  |
| 7                                                | 63          | 48%                  | 61           | 31%                  | 80        | 81%                  |
| <b>Sensor Use during First 14 Days</b>           |             |                      |              |                      |           |                      |
| 4-13                                             | 16          | 50%                  | 24           | 21%                  | 13        | 46%                  |
| 14                                               | 57          | 46%                  | 48           | 33%                  | 73        | 85%                  |
| <b>Sensor Use during First 21 Days</b>           |             |                      |              |                      |           |                      |
| 7-17                                             | 9           | 44%                  | 11           | 27%                  | 7         | 29%                  |
| 18-20                                            | 15          | 47%                  | 26           | 15%                  | 12        | 58%                  |
| 21                                               | 49          | 47%                  | 35           | 40%                  | 67        | 88%                  |
| <b>Sensor Use during First 28 Days</b>           |             |                      |              |                      |           |                      |
| 7-23                                             | 14          | 29%                  | 16           | 19%                  | 9         | 44%                  |
| 24-26                                            | 9           | 44%                  | 18           | 11%                  | 7         | 57%                  |
| 27-28                                            | 50          | 52%                  | 38           | 42%                  | 70        | 86%                  |
| <b>Sensor Use during 15-28 Days</b>              |             |                      |              |                      |           |                      |
| 0-10                                             | 8           | 13%                  | 13           | 23%                  | 7         | 43%                  |
| 11-13                                            | 18          | 50%                  | 23           | 9%                   | 16        | 50%                  |
| 14                                               | 47          | 51%                  | 36           | 44%                  | 63        | 90%                  |
| <b>% of day 71-180 mg/dL during First Month</b>  |             |                      |              |                      |           |                      |
| 20-<55%                                          | 27          | 30%                  | 30           | 13%                  | 7         | 14%                  |
| 55-<70%                                          | 33          | 58%                  | 28           | 36%                  | 33        | 82%                  |
| 70-95%                                           | 13          | 54%                  | 14           | 50%                  | 46        | 87%                  |
| <b>% of day ≤70 mg/dL during First Month</b>     |             |                      |              |                      |           |                      |
| 5-31%                                            | 14          | 21%                  | 30           | 27%                  | 33        | 82%                  |
| 2-<5%                                            | 24          | 54%                  | 25           | 32%                  | 28        | 79%                  |
| 0-<2%                                            | 35          | 51%                  | 17           | 29%                  | 25        | 76%                  |
| <b>% of day &gt;180 mg/dL during First Month</b> |             |                      |              |                      |           |                      |
| 40-79%                                           | 29          | 38%                  | 32           | 13%                  | 7         | 43%                  |
| 25-<40%                                          | 33          | 52%                  | 23           | 39%                  | 30        | 80%                  |
| 1-<25%                                           | 11          | 55%                  | 17           | 47%                  | 49        | 84%                  |

\* One subject was missing sensor data for the first month due to a defective device that could not be downloaded

Appendix Figure 1. Association between Change in HbA1c from Baseline to Six Months and the Average Amount of CGM Use Per Week During the Six Months of the Study

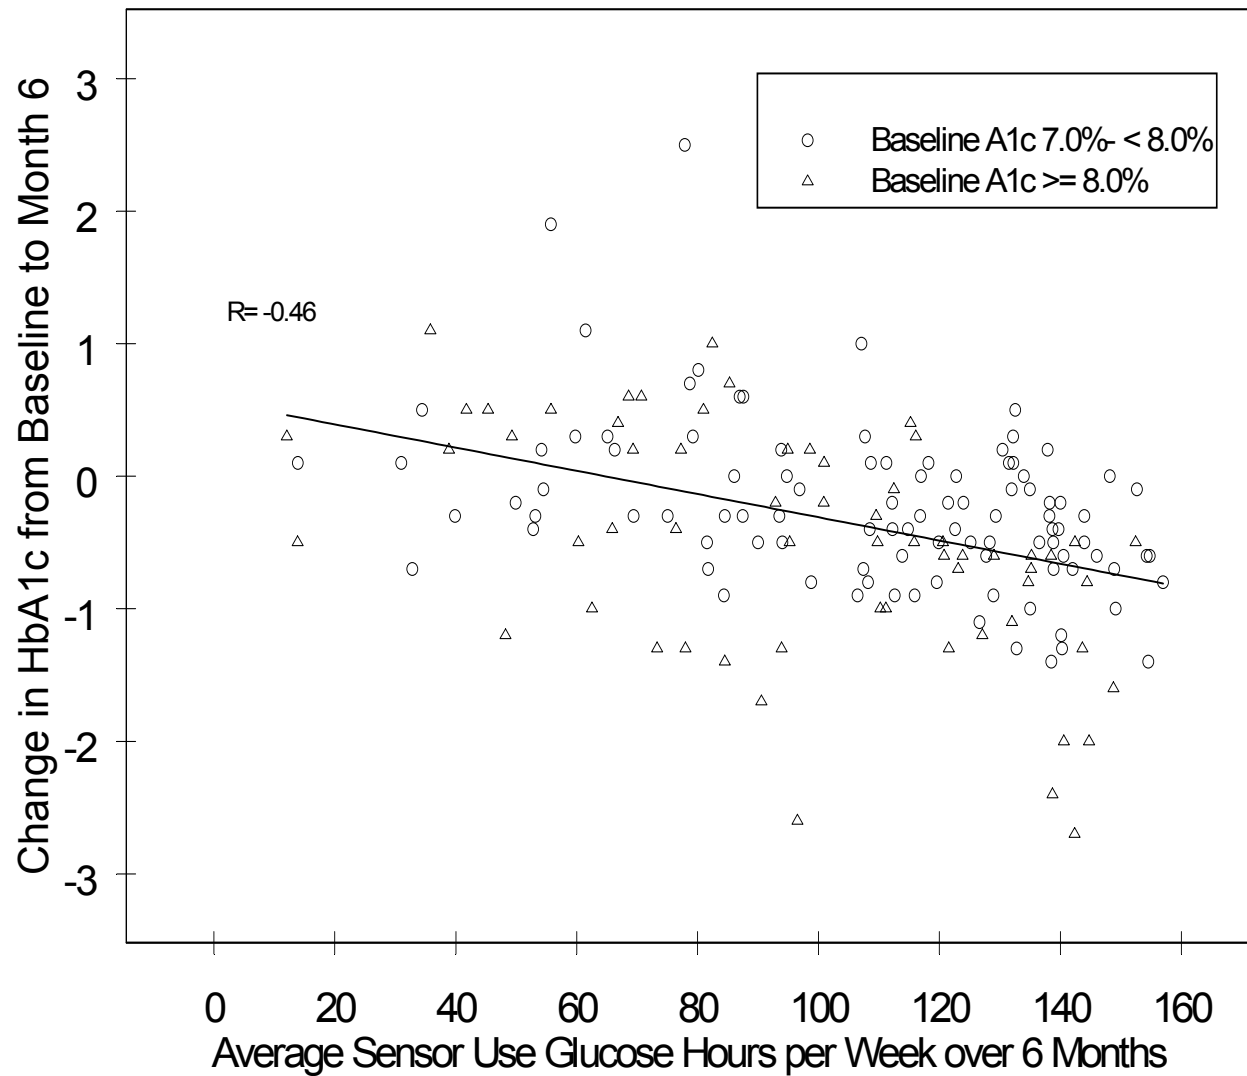

## **Disclosure**

Financial support: Study funding was provided by the Juvenile Diabetes Research Foundation, Inc. (grant numbers 22-2006-1107, 22-2006-1117, 22-2006-1112, 22-2006-1123, and 01-2006-8031).

Continuous glucose monitors and sensors were purchased at a bulk discount price from DexCom, Inc. (San Diego, CA), Medtronic MiniMed, Inc. (Northridge, CA), and Abbott Diabetes Care, Inc. (Alameda, CA.). Home glucose meters and test strips were provided to the study by LifeScan, Inc. and Abbott Diabetes Care, Inc. The companies had no involvement in the design, conduct, or analysis of the trial or the manuscript preparation.

Below is a listing of relationships of the investigators with companies that make products relevant to the manuscript between July 1, 2006 and June 30, 2008. Research funds where listed below were provided to the legal entity that employs the individual and not directly to the individual.

Jennifer M. Block, RN, CDE reports having received honoraria from Abbott Diabetes Care, Inc. and Medtronic MiniMed, Inc., and serving on a medical advisory board for Tandem Ince. And Arkal Medical; Dr. Bode reports having received consulting fees, honoraria, travel reimbursement, and research funds from Abbott Diabetes Care, Inc., and Medtronic MiniMed, Inc., and grant support from DexCom, Inc.; Dr. Buckingham reports having received a speaker honorarium and research funding from Abbott Diabetes Care, Inc., a fee for serving on a medical advisory board for Lifescan, Inc., a speaker honorarium, consulting fees, and research funding from Medtronic MiniMed, Inc., and a consulting fee from Novo Nordisk, Inc.; Dr. Chase reports having received a speaker honorarium from Abbott Diabetes Care, Inc. and Sanofi-Aventis, and grant support from Symlin; Dr. Fiallo-Scharerer reports having received supplies for research from Abbott Diabetes Care, Inc. and Medtronic MiniMed, Inc.; Dr. Fox reports having received supplies for research from Abbott Diabetes Care, Inc. and Smiths Medical; Dr. Hirsch reports having received consulting fees and travel reimbursement from Abbott Diabetes Care, Inc., and grant support from Medtronic MiniMed, Inc.; Kerry Milaszewski, RN, CDE reports having received consulting fees from Medtronic MiniMed, Inc.; Dr. Laffel reports having received consulting fees from Lifescan, Inc., consulting fees and a speaker honorarium from Abbott Diabetes Care, Inc., consulting fees and research funding from Medtronic MiniMed, Inc., and consulting and speaker fees from Roche; Dr. Mauras reports having received grant support from Medtronic MiniMed, Inc.; Dr. Tamborlane reports having received consulting fees from Abbott Diabetes Care, Inc. and Lifescan, Inc. and consulting fees, a speaker honorarium, and research funding from Medtronic MiniMed, Inc.; Dr. Weinzimer reports having received research support, a speaker honorarium and travel reimbursement from Medtronic MiniMed, Inc., and a speaker honorarium from Animas Corp / Lifescan, Inc.; Dr. Wolpert reports having received consulting fees from Abbott Diabetes Care, Inc. and research funding from Medtronic MiniMed, Inc.; Dr. Wilson reports having received equipment and software from Abbott Diabetes Care, Inc. and Medtronic MiniMed, Inc. and research support from Medtronic MiniMed, Inc. and The Elizabeth Glaser Pediatric AIDS Foundation.

## ***The JDRF Continuous Glucose Monitoring Study Group***

*Clinical Centers:* Listed in order of number of patients enrolled with clinical center name, city, and state. Personnel are listed as (PI) for Principal Investigator, (I) for co-Investigator and (C) for Coordinators:

*Diabetes Care Center, University of Washington, Seattle, WA:* Irl B. Hirsch, M.D. (PI); Lisa K. Gilliam, M.D., Ph.D. (I); Kathy Fitzpatrick, R.N., M.N., C.D.E. (C); Dori Khakpour, R.D., C.D., C.D.E. (C); *Department of Pediatrics, Yale University School of Medicine, New Haven, CT:* Stuart A. Weinzimer, M.D. (PI); William V. Tamborlane, M.D. (I); Brett Ives, M.S.N., A.P.R.N. (C); Joan Bosson-Heenan (C); *Adult Section, Joslin Diabetes Center, Boston, MA:* Howard Wolpert, M.D. (PI); Greeshma Shetty, M.D. (I); Astrid Atakov-Castillo (C); Judith Giusti, M.S., R.D., L.D.N., C.D.E. (C); Stacey O'Donnell, R.N., C.D.E. (C); Suzanne Ghiloni, R.N., C.D.E. (C); *Atlanta Diabetes Associates, Atlanta, GA:* Bruce W. Bode, M.D. (PI); Kelli O'Neil, C.D.E. (C); Lisa Tolbert, R.N., M.N., C.D.E. (C); *Nemours Children's Clinic, Jacksonville, FL:* Tim Wysocki, Ph.D. (co-PI); Larry A. Fox, M.D. (co-PI); Nelly Mauras, M.D. (I); Kimberly Englert, R.N. (C); Joe Permuy, M.S.N., A.R.N.P. (C); *Division of Pediatric Endocrinology and Diabetes, Stanford University, Stanford, CA:* Bruce Buckingham, M.D. (PI); Darrell M. Wilson, M.D. (I); Jennifer Block, R.N., C.D.E. (C); Kari Benassi, R.N., N.P. (C); *Department of Pediatrics, University of Iowa Carver College of Medicine, Iowa City, IA:* Eva Tsalikian, M.D. (PI); Michael Tansey, M.D. (I); Debra Kucera, A.R.N.P., C.P.N.P. (C); Julie Coffey, A.R.N.P., C.P.N.P. (C); Joanne Cabbage (C); *Pediatric Adolescent, and Young Adult Section, Joslin Diabetes Center, Boston, MA:* Lori Laffel, M.D., M.P.H., (PI), Kerry Milaszewski, R.N., C.D.E. (C); Katherine Pratt (C); Elise Bismuth, M.D., M.S., (C); Joyce Keady, M.S.N., C.P.N.P. (C); Margie Lawlor, M.S., C.D.E. (C); *Barbara Davis Center for Childhood Diabetes, University of Colorado, Denver, CO:* H. Peter Chase, M.D. (PI); Rosanna Fiallo-Scharer, M.D. (I); Paul Wadwa, M.D. (I); Laurel Messer, R.N., C.D.E. (C); Victoria Gage, R.N. (C); Patricia Burdick (C); *Departments of Pediatric Endocrinology and Research and Evaluation, Kaiser Permanente, San Diego and Pasadena, CA:* Jean M. Lawrence, Sc.D., M.P.H., M.S.S.A. (co-PI); Robert Clemons, M.D. (co-PI); Michelle Maeva, R.N., C.D.E. (C); Bonnie Sattler, M.S., R.D. (C); *Coordinating Center:* Jaeb Center for Health Research, Tampa, FL: Roy W. Beck, M.D., Ph.D.; Katrina J. Ruedy, M.S.P.H.; Craig Kollman, Ph.D.; Dongyuan Xing, M.P.H.; Judy Jackson *University of Minnesota Central Laboratory:* Michael Steffes, M.D., Ph.D., Jean M. Bucksa, C.L.S., Maren L. Nowicki, C.L.S., Carol Van Hale, C.L.S., Vicky Makky, C.L.S.

*Cost-effectiveness investigators:* *National Opinion Research Center, University of Chicago:* Michael O'Grady, Ph.D.; Elbert Huang, M.D., M.P.H.; Anirban Basu, Ph.D.; David O. Meltzer, M.D., Ph.D.; Lan Zhao, Ph.D. *University of Michigan:* Joyce Lee, M.D., M.P.H.

*Juvenile Diabetes Research Foundation, Inc.:* Aaron J. Kowalski, Ph.D.

*Operations Committee:* Lori Laffel, M.D., M.P.H. (co-chair), William V. Tamborlane, M.D. (co-chair), Roy W. Beck, M.D., Ph.D., Aaron J. Kowalski, Ph.D., Katrina J. Ruedy, M.S.P.H.

*Data and Safety Monitoring Board:* Ruth S. Weinstock, M.D., Ph.D. (chair), Barbara J. Anderson, Ph.D.; Davida Kruger, M.S.N., A.P.R.N.; Lisa LaVange, Ph.D.; Henry Rodriguez, M.D.
